# Supplementary material for: Stigma and Public Support for Parity and Government Spending on Mental Health: A 2013 National Opinion Survey
Source: Atypon-hosted journal article supplement (doi:10.1176/appi.ps.201300550), 2014-10-01
Supplement: 1265_ds001.pdf [file 1265_ds001.pdf]

Un-weighted and Weighted Characteristics of Survey Respondents Compared with National Rates  
(N=1,530)

|                                               | Full Sample<br>Un-weighted | Overall<br>Sample<br>Weighted | National Rates |
|-----------------------------------------------|----------------------------|-------------------------------|----------------|
| <b>Individual characteristics<sup>1</sup></b> |                            |                               |                |
| Female (%)                                    | 52                         | 52                            | 52             |
| Age (%)                                       |                            |                               |                |
| Age 18 – 24                                   | 10                         | 10                            | 13             |
| Age 25 – 34                                   | 14                         | 19                            | 18             |
| Age 35 – 44                                   | 15                         | 18                            | 17             |
| Age 45 – 54                                   | 19                         | 17                            | 18             |
| Age 55 – 64                                   | 21                         | 18                            | 16             |
| Age 65 +                                      | 21                         | 19                            | 18             |
| Race (%)                                      |                            |                               |                |
| White only                                    | 74                         | 67                            | 66             |
| Black only                                    | 9                          | 11                            | 12             |
| Other                                         | 17                         | 22                            | 23             |
| Hispanic Ethnicity                            |                            |                               |                |
| Hispanic                                      | 11                         | 15                            | 15             |
| Non-Hispanic                                  | 89                         | 85                            | 85             |
| Education (%)                                 |                            |                               |                |
| < high school degree                          | 8                          | 12                            | 13             |
| High school degree                            | 28                         | 30                            | 30             |
| Some college                                  | 31                         | 29                            | 29             |
| Bachelor's degree or higher                   | 32                         | 29                            | 29             |
| Household income (%)                          |                            |                               |                |
| Under \$10,000                                | 5                          | 7                             | 5              |
| \$10,000-24,999                               | 12                         | 12                            | 13             |
| \$25,000-49,999                               | 22                         | 23                            | 23             |
| \$50,000-74,999                               | 18                         | 19                            | 18             |
| \$75,000                                      | 42                         | 39                            | 41             |
| Employment status (%)                         |                            |                               |                |
| Employed                                      | 56                         | 54                            | 60             |
| Unemployed                                    | 9                          | 11                            | 5              |
| Retired                                       | 21                         | 19                            | 17             |
| Other (e.g. disabled, homemaker, other)       | 14                         | 17                            | 18             |
| Region (%)                                    |                            |                               |                |
| Northeast                                     | 17                         | 18                            | 18             |
| Midwest                                       | 25                         | 22                            | 21             |
| South                                         | 34                         | 37                            | 37             |
| West                                          | 23                         | 23                            | 23             |

Note: GfK KN sample weights used to calculate descriptive statistics.

<sup>1</sup> Comparison data extracted from the December March 2013 Current Population Survey, as cited by <http://www.knowledgenetworks.com/knpanel/docs/GfK-KnowledgePanel%28R%29-Demographic-Profile>.

**Logistic Regression Results on Americans' Support for Policies Affecting Persons with Mental Illness, 2013**

|                                           | <b>Insurance Parity<sup>1</sup></b><br>N=1,347 | <b>Government Spending on<br/>Mental Health<br/>Treatment<sup>2</sup></b><br>N=1,343 |
|-------------------------------------------|------------------------------------------------|--------------------------------------------------------------------------------------|
|                                           | OR (SE)                                        | OR (SE)                                                                              |
| Male                                      | 0.68 (0.11)*                                   | 0.78 (0.12) †                                                                        |
| Age                                       | 1.01 (0.01) †                                  | 1.01 (0.01)                                                                          |
| Education (ref=less than high school)     |                                                |                                                                                      |
| High school degree                        | 1.73 (0.52) †                                  | 1.39 (0.39)                                                                          |
| Some college                              | 2.36 (0.75)**                                  | 1.75 (0.51) †                                                                        |
| Bachelor's degree or higher               | 2.24 (0.74)*                                   | 2.36 (0.70)**                                                                        |
| Race/Ethnicity (ref=non-Hispanic white)   |                                                |                                                                                      |
| Black, non-Hispanic                       | 1.29 (0.41)                                    | 1.58 (0.47)                                                                          |
| Hispanic                                  | 1.33 (0.35)                                    | 1.08 (0.27)                                                                          |
| Other, non-Hispanic                       | 0.71 (0.31)                                    | 0.74 (0.29)                                                                          |
| 2 or more races, non-Hispanic             | 0.93 (0.38)                                    | 0.61 (0.22)                                                                          |
| Household income (ref=<\$10,000)          |                                                |                                                                                      |
| \$10,000-24,999                           | 2.25 (0.91)*                                   | 0.75 (0.31)                                                                          |
| \$25,000-49,000                           | 2.07 (0.80) †                                  | 0.94 (0.37)                                                                          |
| \$50,000-74,999                           | 1.64 (0.67)                                    | 0.84 (0.34)                                                                          |
| \$75,000+                                 | 1.60 (0.64)                                    | 0.82 (0.33)                                                                          |
| Health Insurance Coverage (ref=uninsured) |                                                |                                                                                      |
| Insured                                   | 1.44 (0.37)                                    | 1.14 (0.29)                                                                          |
| Region (ref= Northeast)                   |                                                |                                                                                      |

|                                                                     |                |                   |
|---------------------------------------------------------------------|----------------|-------------------|
| Midwest                                                             | 0.68 (0.17)    | 0.60 (0.14)*      |
| South                                                               | 0.93 (0.21)    | 0.98 (0.22)       |
| West                                                                | 0.82 (0.20)    | 1.33 (0.32)       |
| Work status (ref=paid work)                                         |                |                   |
| Self-employed                                                       | 0.85 (0.28)    | 0.90 (0.31)       |
| Temporarily laid off                                                | 0.55 (0.33)    | 0.87 (0.59)       |
| Unemployed                                                          | 1.10 (0.38)    | 1.23 (0.39)       |
| Retired                                                             | 0.72 (0.19)    | 0.73 (0.18)       |
| Not working – disabled                                              | 0.70 (0.25)    | 1.03 (0.35)       |
| Not working – other                                                 | 0.67 (0.21)    | 0.91 (0.31)       |
| Political party affiliation (ref=Democrat)                          |                |                   |
| Independent                                                         | 0.70 (0.14) †  | 0.62 (0.11)**     |
| Republican                                                          | 0.51 (0.11)**  | 0.37 (0.07)***    |
| Personal experience with a mental illness or substance use disorder | 2.23 (0.37)*** | 2.57 (0.38)***    |
| Mental illness stigma scale                                         | 0.79 (0.07)*   | 0.80 (0.67-0.95)* |

Note: GfK sample weights used in all models.

†≤0.10; \*≤0.05; \*\*≤0.01; \*\*\*≤0.001 from two-tailed tests

<sup>1</sup> Attitudes about insurance parity were measured on a 5-point Likert scale (1=strongly oppose, 2=somewhat oppose, 3=neither favor nor oppose, 4=somewhat favor, 5=strongly favor)

<sup>2</sup> Attitudes about government spending on mental health treatment were measured on a 5-point Likert scale (1=spend much less, 2=spend less, 3=spend the same as now, 4=spend more, 5=spend much more)
